# Supplementary material for: Growth, structural, optical and electronic transport properties of tetragonal CH3NH3SnBr3 perovskite single crystals
Source: Royal Society of Chemistry journal article supplement (doi:10.1039/d1dt04119c), 2022-01-01
Supplement: d1dt04119c1.pdf [file d1dt04119c1.pdf]

## Electronic supplementary information

### Growth, Structure, Optical and Electronic Transport Properties of Tetragonal $\text{CH}_3\text{NH}_3\text{SnBr}_3$ Perovskite Single Crystal

Yu Wu,<sup>a</sup> Huawei Zhou,<sup>a,\*</sup> Jie Yin,<sup>a,\*</sup> and Xianxi Zhang<sup>a,\*</sup>

<sup>a</sup>*School of Chemistry and Chemical Engineering; College of Materials Science and Engineering; Shandong Provincial Key Laboratory/Collaborative Innovation Center of Chemical Energy Storage; Liaocheng University*

\**E-mail: zhouhuaweipv@163.com; xxzhang3@126.com*

Table S1. Atomic coordinates ( $\times 10^4$ ) and equivalent isotropic displacement parameters ( $\text{Å}^2 \times 10^3$ ) for  $\text{MASnBr}_3$ .

$U(\text{eq})$  is defined as one third of the trace of the orthogonalized  $U_{ij}$  tensor.

| Atom  | x    | y      | z       | $U(\text{eq})$ |
|-------|------|--------|---------|----------------|
| Sn(1) | 5000 | 5000   | 5000    | 25(1)          |
| Sn(2) | 5000 | 5000   | 0       | 37(1)          |
| Br(1) | 5000 | 5000   | 2493(1) | 101(1)         |
| Br(3) | 5000 | 0      | 0       | 101(1)         |
| Br(2) | 5000 | 0      | 5000    | 99(1)          |
| C(1)  | 0    | 0      | 2790(1) | 151(1)         |
| N(1)  | 0    | 770(5) | 1599(1) | 314(1)         |

Table S2. Bond lengths [ $\text{Å}$ ] and angles [ $\text{deg}$ ] for  $\text{MASnBr}_3$ .

| Bond          | Bond lengths [ $\text{Å}$ ] and angles [ $\text{deg}$ ] |
|---------------|---------------------------------------------------------|
| Sn(1)-Br(2)#1 | 2.9347(4)                                               |
| Sn(1)-Br(2)#2 | 2.9346(4)                                               |

---

|               |            |
|---------------|------------|
| Sn(1)-Br(2)   | 2.9346(4)  |
| Sn(1)-Br(2)#3 | 2.9346(4)  |
| Sn(1)-Br(1)   | 2.9389(5)  |
| Sn(1)-Br(1)#4 | 2.9389(5)  |
| Sn(2)-Br(1)#5 | 2.9225(5)  |
| Sn(2)-Br(1)   | 2.9225(5)  |
| Sn(2)-Br(3)#1 | 2.9346(4)  |
| Sn(2)-Br(3)   | 2.9346(4)  |
| Sn(2)-Br(3)#3 | 2.9346(4)  |
| Sn(2)-Br(3)#2 | 2.9346(4)  |
| Br(3)-Sn(2)#6 | 2.9346(4)  |
| Br(2)-Sn(1)#6 | 2.9346(4)  |
| C(1)-N(1)     | 1.4679(17) |
| C(1)-H(1A)    | 0.9602     |
| C(1)-H(1B)    | 0.9602     |
| C(1)-H(1C)    | 0.9602     |
| N(1)-H(1D)    | 0.8900     |
| N(1)-H(1E)    | 0.8900     |
| N(1)-H(1F)    | 0.8900     |

|                       |       |
|-----------------------|-------|
| Br(2)#1-Sn(1)-Br(2)#2 | 180.0 |
| Br(2)#1-Sn(1)-Br(2)   | 90.0  |
| Br(2)#2-Sn(1)-Br(2)   | 90.0  |
| Br(2)#1-Sn(1)-Br(2)#3 | 90.0  |
| Br(2)#2-Sn(1)-Br(2)#3 | 90.0  |
| Br(2)-Sn(1)-Br(2)#3   | 180.0 |
| Br(2)#1-Sn(1)-Br(1)   | 90.0  |
| Br(2)#2-Sn(1)-Br(1)   | 90.0  |
| Br(2)-Sn(1)-Br(1)     | 90.0  |
| Br(2)#3-Sn(1)-Br(1)   | 90.0  |
| Br(2)#1-Sn(1)-Br(1)#4 | 90.0  |
| Br(2)#2-Sn(1)-Br(1)#4 | 90.0  |
| Br(2)-Sn(1)-Br(1)#4   | 90.0  |
| Br(2)#3-Sn(1)-Br(1)#4 | 90.0  |
| Br(1)-Sn(1)-Br(1)#4   | 180.0 |
| Br(1)#5-Sn(2)-Br(1)   | 180.0 |
| Br(1)#5-Sn(2)-Br(3)#1 | 90.0  |
| Br(1)-Sn(2)-Br(3)#1   | 90.0  |
| Br(1)#5-Sn(2)-Br(3)   | 90.0  |
| Br(1)-Sn(2)-Br(3)     | 90.0  |
| Br(3)#1-Sn(2)-Br(3)   | 90.0  |
| Br(1)#5-Sn(2)-Br(3)#3 | 90.0  |
| Br(1)-Sn(2)-Br(3)#3   | 90.0  |
| Br(3)#1-Sn(2)-Br(3)#3 | 90.0  |

---

|                       |       |
|-----------------------|-------|
| Br(3)-Sn(2)-Br(3)#3   | 180.0 |
| Br(1)#5-Sn(2)-Br(3)#2 | 90.0  |
| Br(1)-Sn(2)-Br(3)#2   | 90.0  |
| Br(3)#1-Sn(2)-Br(3)#2 | 180.0 |
| Br(3)-Sn(2)-Br(3)#2   | 90.0  |
| Br(3)#3-Sn(2)-Br(3)#2 | 90.0  |
| Sn(2)-Br(1)-Sn(1)     | 180.0 |
| Sn(2)#6-Br(3)-Sn(2)   | 180.0 |
| Sn(1)#6-Br(2)-Sn(1)   | 180.0 |
| N(1)-C(1)-H(1A)       | 109.5 |
| N(1)-C(1)-H(1B)       | 109.5 |
| H(1A)-C(1)-H(1B)      | 109.5 |
| N(1)-C(1)-H(1C)       | 109.5 |
| H(1A)-C(1)-H(1C)      | 109.5 |
| H(1B)-C(1)-H(1C)      | 109.5 |
| C(1)-N(1)-H(1D)       | 109.5 |
| C(1)-N(1)-H(1E)       | 109.5 |
| H(1D)-N(1)-H(1E)      | 109.5 |
| C(1)-N(1)-H(1F)       | 109.5 |
| H(1D)-N(1)-H(1F)      | 109.5 |
| H(1E)-N(1)-H(1F)      | 109.5 |

Symmetry transformations used to generate equivalent atoms:

#1 -y+1,x,z    #2 -y,x,z    #3 x,y+1,z

#4 -x+1,-y+1,-z+1    #5 -x+1,-y+1,-z

#6 x,y-1,z

Table S3. Anisotropic displacement parameters ( $\text{Å}^2 \times 10^3$ ) for  $\text{MASnBr}_3$ .

The anisotropic displacement factor exponent takes the form:

$$-2 \pi^2 [ h^2 a^{*2} U_{11} + \dots + 2 h k a^* b^* U_{12} ]$$

|       | U11    | U22    | U33    | U23   | U13 | U12 |
|-------|--------|--------|--------|-------|-----|-----|
| Sn(1) | 22(1)  | 22(1)  | 31(1)  | 0     | 0   | 0   |
| Sn(2) | 40(1)  | 40(1)  | 32(1)  | 0     | 0   | 0   |
| Br(1) | 123(1) | 123(1) | 57(1)  | 0     | 0   | 0   |
| Br(3) | 127(1) | 53(1)  | 123(1) | 0     | 0   | 0   |
| Br(2) | 118(1) | 49(1)  | 128(1) | 0     | 0   | 0   |
| C(1)  | 151(1) | 151(1) | 149(1) | 0     | 0   | 0   |
| N(1)  | 313(1) | 314(1) | 315(1) | -1(1) | 0   | 0   |

Table S4. Hydrogen coordinates ( $\times 10^4$ ) and isotropic displacement parameters ( $\text{Å}^2 \times 10^3$ ) for  $\text{MASnBr}_3$ .

|       | x     | y     | z    | U(eq) |
|-------|-------|-------|------|-------|
| H(1A) | 432   | 1240  | 3278 | 226   |
| H(1B) | 1066  | -1228 | 2878 | 226   |
| H(1C) | -1498 | -516  | 2994 | 226   |
| H(1D) | 380   | -385  | 1146 | 471   |
| H(1E) | 1004  | 1894  | 1515 | 471   |
| H(1F) | -1383 | 1269  | 1414 | 471   |

Table S5. Torsion angles [deg] for  $\text{MASnBr}_3$ .

| Bond                        | Bond lengths [Å] and angles [deg] |
|-----------------------------|-----------------------------------|
| Br(1)#5-Sn(2)-Br(1)-Sn(1)   | 0(19)                             |
| Br(3)#1-Sn(2)-Br(1)-Sn(1)   | 136(5)                            |
| Br(3)-Sn(2)-Br(1)-Sn(1)     | -134(5)                           |
| Br(3)#3-Sn(2)-Br(1)-Sn(1)   | 46(5)                             |
| Br(3)#2-Sn(2)-Br(1)-Sn(1)   | -44(5)                            |
| Br(2)#1-Sn(1)-Br(1)-Sn(2)   | -136(36)                          |
| Br(2)#2-Sn(1)-Br(1)-Sn(2)   | 44(10)                            |
| Br(2)-Sn(1)-Br(1)-Sn(2)     | 134(10)                           |
| Br(2)#3-Sn(1)-Br(1)-Sn(2)   | -46(10)                           |
| Br(1)#4-Sn(1)-Br(1)-Sn(2)   | 0(22)                             |
| Br(1)#5-Sn(2)-Br(3)-Sn(2)#6 | 0.0                               |
| Br(1)-Sn(2)-Br(3)-Sn(2)#6   | 0.0                               |
| Br(3)#1-Sn(2)-Br(3)-Sn(2)#6 | 0.0                               |
| Br(3)#3-Sn(2)-Br(3)-Sn(2)#6 | 0.0                               |
| Br(3)#2-Sn(2)-Br(3)-Sn(2)#6 | 0.0                               |
| Br(2)#1-Sn(1)-Br(2)-Sn(1)#6 | 180.0                             |
| Br(2)#2-Sn(1)-Br(2)-Sn(1)#6 | 0.0                               |
| Br(2)#3-Sn(1)-Br(2)-Sn(1)#6 | 0.0                               |
| Br(1)-Sn(1)-Br(2)-Sn(1)#6   | -90.0                             |
| Br(1)#4-Sn(1)-Br(2)-Sn(1)#6 | 90.0                              |

Symmetry transformations used to generate equivalent atoms:

#1  $-y+1,x,z$     #2  $-y,x,z$     #3  $x,y+1,z$

#4  $-x+1,-y+1,-z+1$     #5  $-x+1,-y+1,-z$     #6  $x,y-1,z$
